# Supplementary material for: Genetic and functional analysis reveals TENM4 contributes to schizophrenia
Source: PubMed Central journal article supplement — iScience. 2021 Aug 30;24(9):103063. doi: 10.1016/j.isci.2021.103063 (PMC8449235; doi:10.1016/j.isci.2021.103063), 2021-08-30
Supplement: mmc1.pdf [file mmc1.pdf]

iScience, Volume 24

## Supplemental information

### Genetic and functional analysis reveals

#### *TENM4* contributes to schizophrenia

Xin Yi, Minzhe Li, Guang He, Huihui Du, Xingwang Li, Dongmei Cao, Lu Wang, Xi Wu, Fengping Yang, Xu Chen, Lin He, Yong Ping, and Daizhan Zhou

## Supplemental Figures

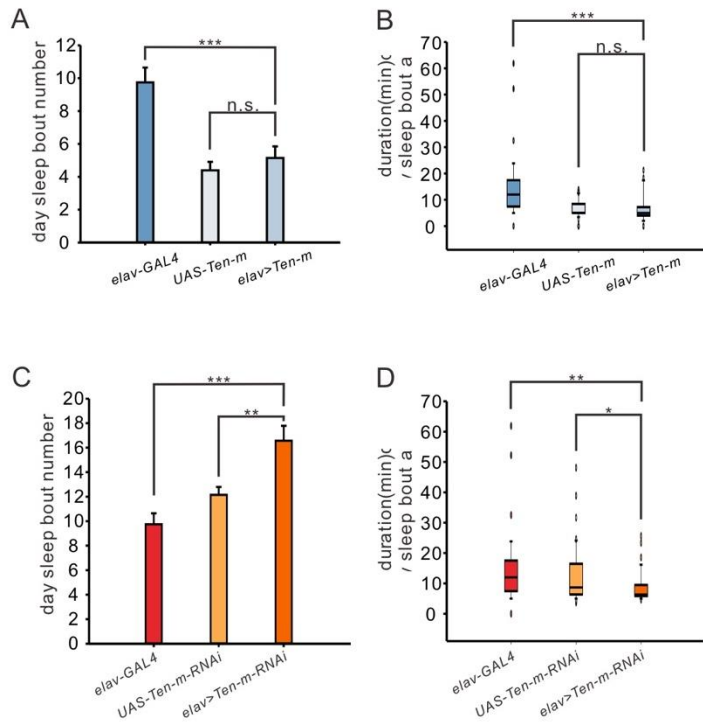

**Figure S1. Day-sleep phenotypes in *Ten-m* overexpressed and down-expressed mutants, Related to Figure 2.**

(A, B) Histograms of the number of day sleep bouts during day-time (A) and boxplots of the day sleep bout duration (B) for controls (*elav-GAL4* and *UAS-Ten-m*) and experimental flies (*elav>Ten-m*).

(C, D) Histograms of the number of day sleep bouts during day-time (C) and boxplots of the day sleep bout duration (D) for controls (*elav-GAL4* and *Ten-m-RNAi*) and experimental flies (*elav>Ten-m-RNAi*).

Overexpression of *Ten-m* shows no difference with controls in day sleep time but shows difference in day sleep bout number and sleep bout duration. It suggested that over-expressing *Ten-m* would affect day-time sleep in *Drosophila* (Figure S1A, day sleep bout number: *elav-GAL4* vs *elav> Ten-m*, \*\* $p=0.004$ , *UAS-Ten-m* vs *elav>Ten-m*,  $p = 1.000$ ; 1B, day sleep bout duration: *elav-GAL4* vs *elav> Ten-m*, \*\*\* $p < 0.001$ , *UAS-Ten-m* vs *elav>Ten-m*, \*\*\* $p < 0.001$ ). Similarly, down-expression of *Ten-m*

performed decreased sleep bout number and decreased sleep bout duration, but no difference in day sleep time. We supposed that lack of *Ten-m* function would cause day sleep fragmentation in *Drosophila*. (Figure S1C, day sleep bout number: *elav-GAL4* vs *elav>Ten-m-RNAi*, \*\*\* $p < 0.001$ , *UAS-Ten-m-RNAi* vs *elav>Ten-m-RNAi*, \* $p = 0.018$ ; S1D, day sleep bout duration: *elav-GAL4* vs *elav>Ten-m-RNAi*, \*\*\* $p = 0.002$ , *UAS-Ten-m-RNAi* vs *elav>Ten-m-RNAi*, \* $p = 0.032$ ).

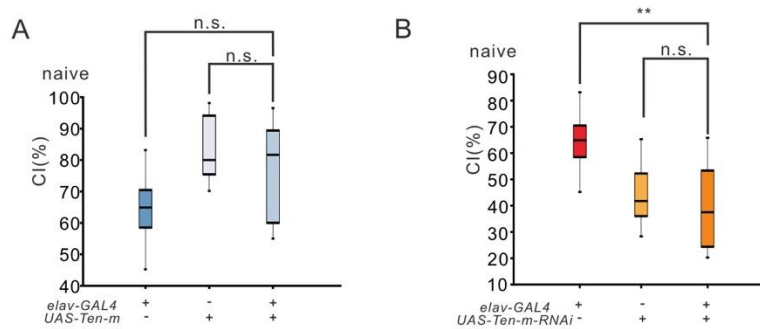

**Figure S2. Aberrant expression of *Ten-m* has little effect on courtship behavior on naive files, Related to Figure 3.**

(A) CIs of experimental naïve males (*elav>Ten-m*) compared with CIs of control naïve males (*elav-GAL4* and *UAS-Ten-m*), *elav-GAL4* vs *elav>Ten-m*,  $p = 0.096$ , *UAS-Ten-m* vs *elav>Ten-m*,  $p = 0.649$ ; It showed overexpressing *Ten-m* in all neurons would not affect courtship behavior.

(B) CIs of experimental naïve males (*elav>Ten-m-RNAi*) compared with CIs of control naïve males (*elav-GAL4* and *UAS-Ten-m-RNAi*, *elav-GAL4* vs *elav>Ten-m-RNAi*, \*\* $p = 0.002$ , *UAS-Ten-m-RNAi* vs *elav>Ten-m-RNAi*,  $p = 0.623$ ); It suggested down-expressing *Ten-m* in all neurons had little effect on courtship behavior.

**Supplemental Table S1 fly stocks, Related to Methods.**

| <b>Fly Line</b>          | <b>RRID</b>         | <b>Collection</b>        |
|--------------------------|---------------------|--------------------------|
| <i>elav-GAL4</i>         | flybase_FBst0000458 | Bloomington Stock Center |
| <i>Mz19-GAL4</i>         | flybase_FBal0155865 | Bloomington Stock Center |
| <i>Mz699-GAL4</i>        | flybase_FBal0066073 | Bloomington Stock Center |
| <i>UAS-Ten-m</i>         | flybase_FBst0041569 | Bloomington Stock Center |
| <i>UAS-Ten-m-RNAi</i>    | flybase_FBtp0052660 | Bloomington Stock Center |
| <i>w;Cyo/sco;MKRS/Tb</i> | flybase_FBst0305835 | Kyoto Stock Center       |
| <i>LN1-GAL4</i>          | flybase_FBst0302813 | Kyoto Stock Center       |

**Supplemental Table S4 GO enrichment analysis of DEGs in *elav>Ten-m* group, Related to Figure 5.**

| Category | Term                                                                                | Count | PValue   | Gene ID                                                                                                |
|----------|-------------------------------------------------------------------------------------|-------|----------|--------------------------------------------------------------------------------------------------------|
| BP       | GO:0009124~nucleoside monophosphate biosynthetic process                            | 5     | 7.54E-04 | FBGN0013972, FBGN0038172, FBGN0000053, FBGN0020513, FBGN0013973                                        |
| BP       | GO:0009123~nucleoside monophosphate metabolic process                               | 5     | 0.001009 | FBGN0013972, FBGN0038172, FBGN0000053, FBGN0020513, FBGN0013973                                        |
| BP       | GO:0034404~nucleobase, nucleoside and nucleotide biosynthetic process               | 7     | 0.00192  | FBGN0028997, FBGN0020513, FBGN0026602, FBGN0013973                                                     |
| BP       | GO:0034654~nucleobase, nucleoside, nucleotide and nucleic acid biosynthetic process | 7     | 0.00192  | FBGN0013972, FBGN0038172, FBGN0000053, FBGN0028997, FBGN0020513, FBGN0026602, FBGN0013973              |
| BP       | GO:0044271~nitrogen compound biosynthetic process                                   | 8     | 0.003064 | FBGN0013972, FBGN0038172, FBGN0031148, FBGN0000053, FBGN0028997, FBGN0020513, FBGN0026602, FBGN0013973 |
| BP       | GO:0006164~purine nucleotide biosynthetic process                                   | 6     | 0.003712 | FBGN0013972, FBGN0038172, FBGN0000053, FBGN0028997, FBGN0020513, FBGN0013973                           |
| BP       | GO:0006163~purine nucleotide metabolic process                                      | 6     | 0.004388 | FBGN0013972, FBGN0038172, FBGN0000053, FBGN0028997, FBGN0020513, FBGN0013973                           |
| BP       | GO:0009165~nucleotide biosynthetic process                                          | 6     | 0.008211 | FBGN0013972, FBGN0038172, FBGN0000053, FBGN0028997, FBGN0020513, FBGN0013973                           |
| BP       | GO:0009168~purine ribonucleoside monophosphate biosynthetic process                 | 3     | 0.008546 | FBGN0038172, FBGN0000053, FBGN0020513                                                                  |
| BP       | GO:0009127~purine nucleoside monophosphate biosynthetic process                     | 3     | 0.008546 | FBGN0038172, FBGN0000053, FBGN0020513                                                                  |
| BP       | GO:0009126~purine nucleoside monophosphate metabolic process                        | 3     | 0.008546 | FBGN0038172, FBGN0000053, FBGN0020513                                                                  |
| BP       | GO:0009167~purine ribonucleoside monophosphate metabolic process                    | 3     | 0.008546 | FBGN0038172, FBGN0000053, FBGN0020513                                                                  |
| BP       | GO:0009161~ribonucleoside monophosphate metabolic process                           | 3     | 0.012917 | FBGN0038172, FBGN0000053, FBGN0020513                                                                  |
| BP       | GO:0009156~ribonucleoside monophosphate biosynthetic process                        | 3     | 0.012917 | FBGN0038172, FBGN0000053, FBGN0020513                                                                  |
| BP       | GO:0051130~positive regulation of cellular component organization                   | 3     | 0.019466 | FBGN0002948, FBGN0003687, FBGN0003317                                                                  |
| BP       | GO:0009113~purine base biosynthetic process                                         | 2     | 0.040902 | FBGN0000053, FBGN0020513                                                                               |
| BP       | GO:0051294~establishment of spindle orientation                                     | 2     | 0.048882 | FBGN0002948, FBGN0000147                                                                               |
| BP       | GO:0006189~'de novo' IMP biosynthetic process                                       | 2     | 0.048882 | FBGN0000053, FBGN0020513                                                                               |
| BP       | GO:0031334~positive regulation of                                                   | 2     | 0.04888  | FBGN0002948, FBGN0003687                                                                               |

---

|    |                                               |   |         |                                        |
|----|-----------------------------------------------|---|---------|----------------------------------------|
|    | protein complex assembly                      |   | 2       |                                        |
| CC | GO:0019898~extrinsic to membrane              | 6 | 0.01669 | FBGN0033697, FBGN0001253, FBGN0015035, |
|    |                                               |   | 1       | FBGN0000473, FBGN0003861, FBGN0020392  |
| CC | GO:0044427~chromosomal part                   | 7 | 0.03015 | FBGN0000588, FBGN0027259, FBGN0052438, |
|    |                                               | 6 |         | FBGN0038979, FBGN0017414, FBGN0032105, |
|    |                                               |   |         | FBGN0038612                            |
| CC | GO:0008074~guanylate cyclase complex, soluble | 2 | 0.04816 | FBGN0013972, FBGN0013973               |
|    |                                               |   | 6       |                                        |

---

**Supplemental Table S5 GO enrichment analysis of DEGs in *elav>Ten-m-RNAi* group, Related to Figure 5.**

| Category | Term                                                                 | Count | PValue   | Gene ID                                                                                   |
|----------|----------------------------------------------------------------------|-------|----------|-------------------------------------------------------------------------------------------|
| BP       | GO:0009416~response to light stimulus                                | 7     | 6.33E-04 | FBGN0013972, FBGN0003068, FBGN0004435, FBGN0014396, FBGN0019940, FBGN0003861, FBGN0005614 |
| BP       | GO:0009314~response to radiation                                     | 7     | 0.001202 | FBGN0013972, FBGN0003068, FBGN0004435, FBGN0014396, FBGN0019940, FBGN0003861, FBGN0005614 |
| BP       | GO:0009583~detection of light stimulus                               | 5     | 0.001999 | FBGN0013972, FBGN0004435, FBGN0019940, FBGN0003861, FBGN0005614                           |
| BP       | GO:0019731~antibacterial humoral response                            | 4     | 0.002785 | FBGN0010388, FBGN0041579, FBGN0004240, FBGN0010385                                        |
| BP       | GO:0009582~detection of abiotic stimulus                             | 5     | 0.002822 | FBGN0013972, FBGN0004435, FBGN0019940, FBGN0003861, FBGN0005614                           |
| BP       | GO:0009581~detection of external stimulus                            | 5     | 0.003853 | FBGN0013972, FBGN0004435, FBGN0019940, FBGN0003861, FBGN0005614                           |
| BP       | GO:0042742~defense response to bacterium                             | 5     | 0.005988 | FBGN0010388, FBGN0035806, FBGN0041579, FBGN0004240, FBGN0010385                           |
| BP       | GO:0007601~visual perception                                         | 5     | 0.006301 | FBGN0013972, FBGN0004435, FBGN0019940, FBGN0003861, FBGN0005614                           |
| BP       | GO:0050953~sensory perception of light stimulus                      | 5     | 0.006624 | FBGN0013972, FBGN0004435, FBGN0019940, FBGN0003861, FBGN0005614                           |
| BP       | GO:0000096~sulfur amino acid metabolic process                       | 3     | 0.009274 | FBGN0031148, FBGN0020385, FBGN0000565                                                     |
| BP       | GO:0006952~defense response                                          | 7     | 0.009833 | FBGN0010388, FBGN0052282, FBGN0031970, FBGN0035806, FBGN0041579, FBGN0004240, FBGN0010385 |
| BP       | GO:0009617~response to bacterium                                     | 5     | 0.010038 | FBGN0010388, FBGN0035806, FBGN0041579, FBGN0004240, FBGN0010385                           |
| BP       | GO:0007602~phototransduction                                         | 4     | 0.011786 | FBGN0013972, FBGN0004435, FBGN0019940, FBGN0003861                                        |
| BP       | GO:0045087~innate immune response                                    | 5     | 0.016125 | FBGN0010388, FBGN0035806, FBGN0041579, FBGN0004240, FBGN0010385                           |
| BP       | GO:0050908~detection of light stimulus involved in visual perception | 3     | 0.020402 | FBGN0013972, FBGN0003861, FBGN0005614                                                     |
| BP       | GO:0051606~detection of stimulus                                     | 5     | 0.021243 | FBGN0013972, FBGN0004435, FBGN0019940, FBGN0003861, FBGN0005614                           |
| BP       | GO:0007616~long-term memory                                          | 3     | 0.02229  | FBGN0023479, FBGN0003068, FBGN0010399                                                     |
| BP       | GO:0050962~detection of light stimulus involved in                   | 3     | 0.02229  | FBGN0013972, FBGN0003861, FBGN0005614                                                     |

|    |                                                                   |    |          |  |                                                                                                                                                            |
|----|-------------------------------------------------------------------|----|----------|--|------------------------------------------------------------------------------------------------------------------------------------------------------------|
|    | sensory perception                                                |    |          |  | FBGN0013972, FBGN0003068, FBGN0004435,                                                                                                                     |
| BP | GO:0009628~response to abiotic stimulus                           | 7  | 0.025496 |  | FBGN0014396, FBGN0019940, FBGN0003861, FBGN0005614                                                                                                         |
| BP | GO:0050830~defense response to Gram-positive bacterium            | 3  | 0.026273 |  | FBGN0010388, FBGN0035806, FBGN0010385                                                                                                                      |
| BP | GO:0015031~protein transport                                      | 8  | 0.027386 |  | FBGN0031298, FBGN0033460, FBGN0000003, FBGN0035947, FBGN0053180, FBGN0014396, FBGN0035965, FBGN0035589                                                     |
| BP | GO:0009584~detection of visible light                             | 3  | 0.028364 |  | FBGN0013972, FBGN0003861, FBGN0005614                                                                                                                      |
| BP | GO:0045184~establishment of protein localization                  | 8  | 0.030796 |  | FBGN0031298, FBGN0033460, FBGN0000003, FBGN0035947, FBGN0053180, FBGN0014396, FBGN0035965, FBGN0035589                                                     |
| BP | GO:0019730~antimicrobial humoral response                         | 4  | 0.037693 |  | FBGN0010388, FBGN0041579, FBGN0004240, FBGN0010385                                                                                                         |
| BP | GO:0007611~learning or memory                                     | 4  | 0.047813 |  | FBGN0023479, FBGN0003068, FBGN0010399, FBGN0003861                                                                                                         |
| CC | GO:0016028~rhabdomere                                             | 4  | 0.003215 |  | FBGN0004435, FBGN0019940, FBGN0003861, FBGN0005614                                                                                                         |
| CC | GO:0016027~inaD signaling complex                                 | 3  | 0.00492  |  | FBGN0004435, FBGN0003861, FBGN0005614                                                                                                                      |
| CC | GO:0005887~integral to plasma membrane                            | 7  | 0.031467 |  | FBGN0003317, FBGN0031970, FBGN0035806, FBGN0010399, FBGN0003861, FBGN0003515, FBGN0005614                                                                  |
| CC | GO:0031226~intrinsic to plasma membrane                           | 7  | 0.033534 |  | FBGN0003317, FBGN0031970, FBGN0035806, FBGN0010399, FBGN0003861, FBGN0003515, FBGN0005614                                                                  |
| CC | GO:0019898~extrinsic to membrane                                  | 6  | 0.037689 |  | FBGN0033979, FBGN0015037, FBGN0004435, FBGN0035790, FBGN0003861, FBGN0005614                                                                               |
| CC | GO:0005576~extracellular region                                   | 12 | 0.040842 |  | FBGN0010388, FBGN0052282, FBGN0029791, FBGN0023479, FBGN0035806, FBGN0041579, FBGN0086677, FBGN0032048, FBGN0004240, FBGN0031414, FBGN0010385, FBGN0053196 |
| MF | GO:0046982~protein heterodimerization activity                    | 4  | 0.017524 |  | FBGN0003068, FBGN0014396, FBGN0003861, FBGN0005614                                                                                                         |
| MF | GO:0008086~light-activated voltage-gated calcium channel activity | 2  | 0.023354 |  | FBGN0003861, FBGN0005614                                                                                                                                   |
| MF | GO:0010461~light-activated channel activity                       | 2  | 0.023354 |  | FBGN0003861, FBGN0005614                                                                                                                                   |
| MF | GO:0046983~protein dimerization activity                          | 5  | 0.034715 |  | FBGN0039051, FBGN0003068, FBGN0014396, FBGN0003861, FBGN0005614                                                                                            |



**Supplemental Table S6 GO enrichment analysis of overlapped significant DEGs in *elav>Ten-m* and *elav>Ten-m-RNAi* groups, Related to Figure 5.**

| Category | Term                            | Count | PValue   | Gene ID                                      |
|----------|---------------------------------|-------|----------|----------------------------------------------|
| BP       | GO:0022008~neurogenesis         | 5     | 0.079555 | <i>NELF-E, USE1, DCTN4-P62, KMNI, INTS12</i> |
| CC       | GO:0000795~synaptonemal complex | 2     | 0.023697 | <i>CONA, MLH1</i>                            |
| MF       | GO:0016887~ATPase activity      | 3     | 0.088953 | <i>CG1494, SMC5, MLH1</i>                    |
